# Supplementary material for: The HRP3 PWWP domain recognizes the minor groove of double-stranded DNA and recruits HRP3 to chromatin
Source: PubMed Central journal article supplement (PMC6547440; doi:10.1093/nar/gkz294), 2019-04-24
Supplement: gkz294_supplemental_file.pdf [file gkz294_supplemental_file.pdf]

## Supplementary Data for

The HRP3 PWWP domain recognizes the minor groove of double-stranded DNA and recruits HRP3 to chromatin

Wei Tian, Peiqiang Yan, Ning Xu, Arghya Chakravorty, Robert Liefke\*, Qiaoran Xi\* and Zhanxin Wang\*

\*Email: robert.liefke@imt.uni-marburg.de; xiqiaoran@tsinghua.edu.cn;  
wangz@bnu.edu.cn;

This PDF file includes:

Supplementary Figures S1 to S5  
Supplementary Table S1

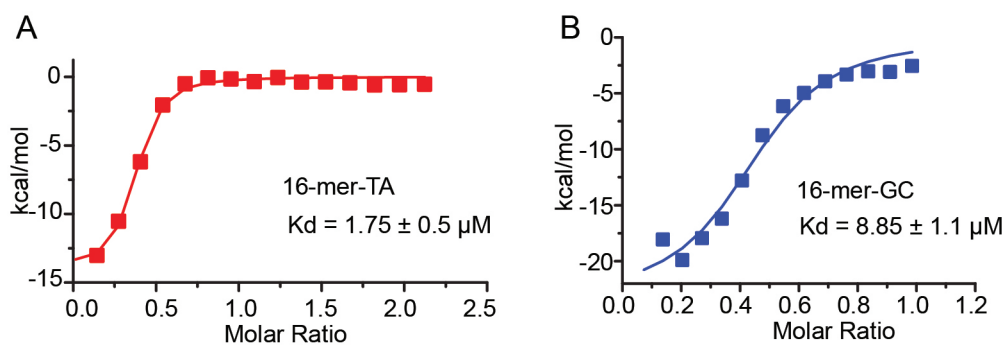

**Supplementary Figure S1.** ITC-based measurements of the binding affinities of HRP3 PWWP and various DNAs. (A, B) ITC-based binding curves of HRP3 PWWP titrated with the 16-mer-TA DNA (A) or the 16-mer-GC DNA (B).

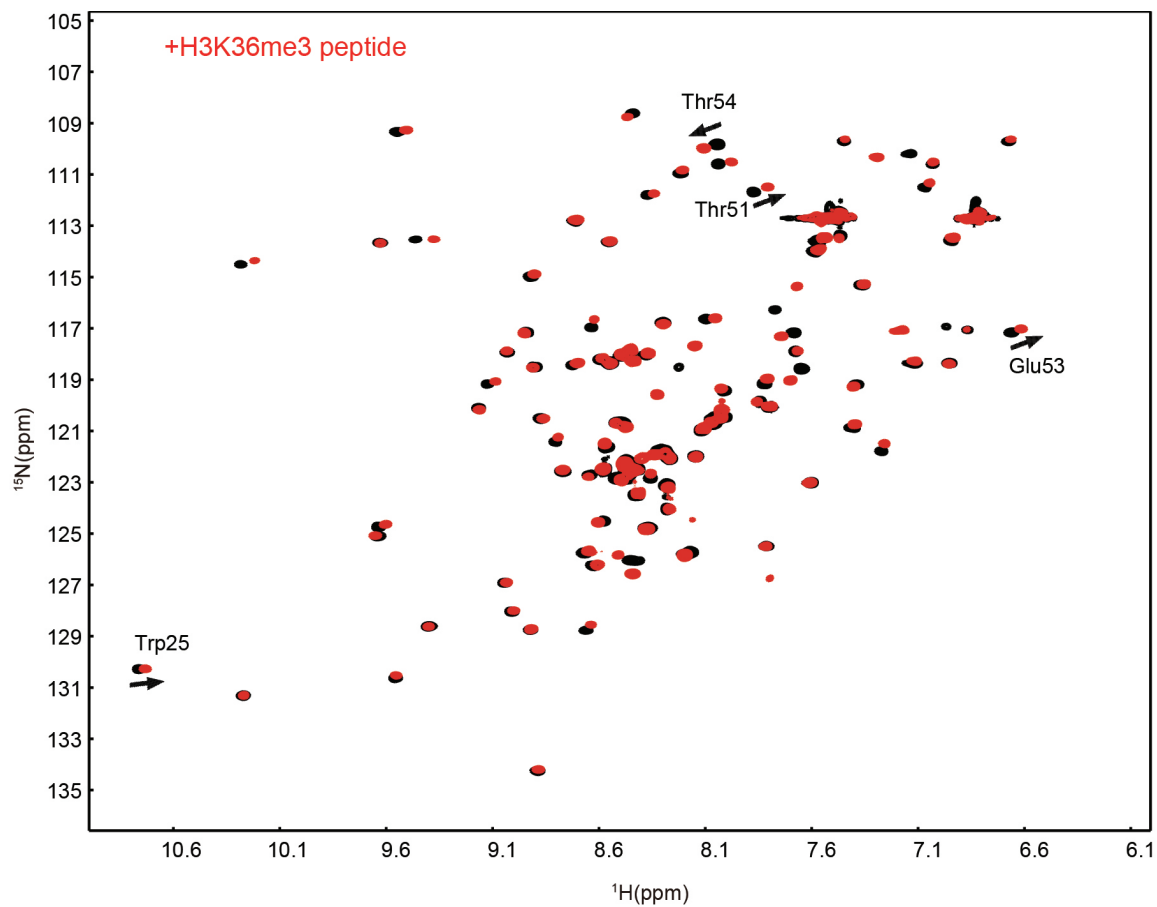

**Supplementary Figure S2.** Changes induced in the  $^1\text{H}$ - $^{15}\text{N}$  HSQC NMR spectra of HRP3 PWWP upon binding of 4 mM H3K36me3 peptide. Superposition of the  $^1\text{H}$ - $^{15}\text{N}$  HSQC NMR spectra of HRP3 PWWP in the absence (black) and presence (red) of 4 mM H3K36me3 peptide.

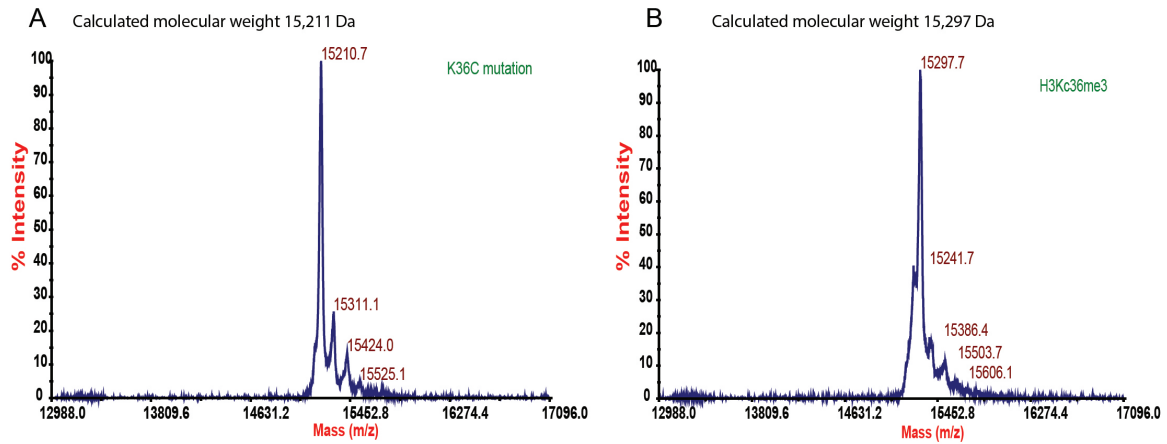

**Supplementary Figure S3.** Mass spectra to verify the incorporation of the trimethylation analogue of H3K36me3. (A, B) Mass spectra of H3 bearing the K36C mutation (A) and the trimethylation analogue of H3Kc36me3 (B). Calculated molecular weights of both peptides are indicated above the panels.

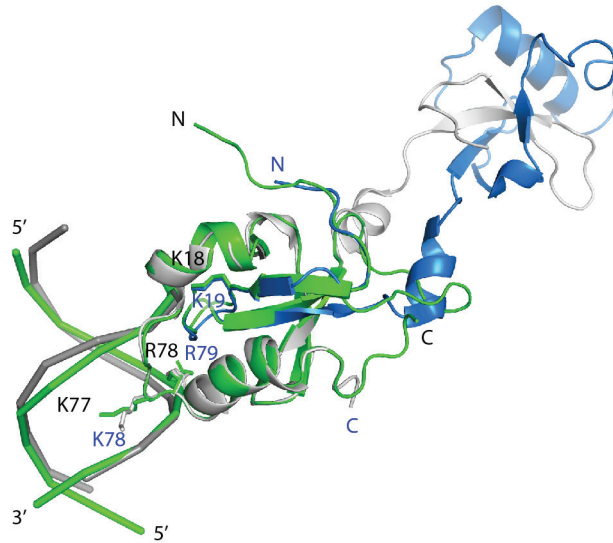

**Supplementary Figure S4.** Comparison of the DNA-bound structures of HRP3 PWWP and HDGF PWWP (PDB ID: 5XSK). HRP3 PWWP domain is coloured green. Swapped HDGF PWWP domains are coloured grey and blue, respectively. Key residues for the DNA recognition in HRP3 and HDGF are labelled in black and blue, respectively.

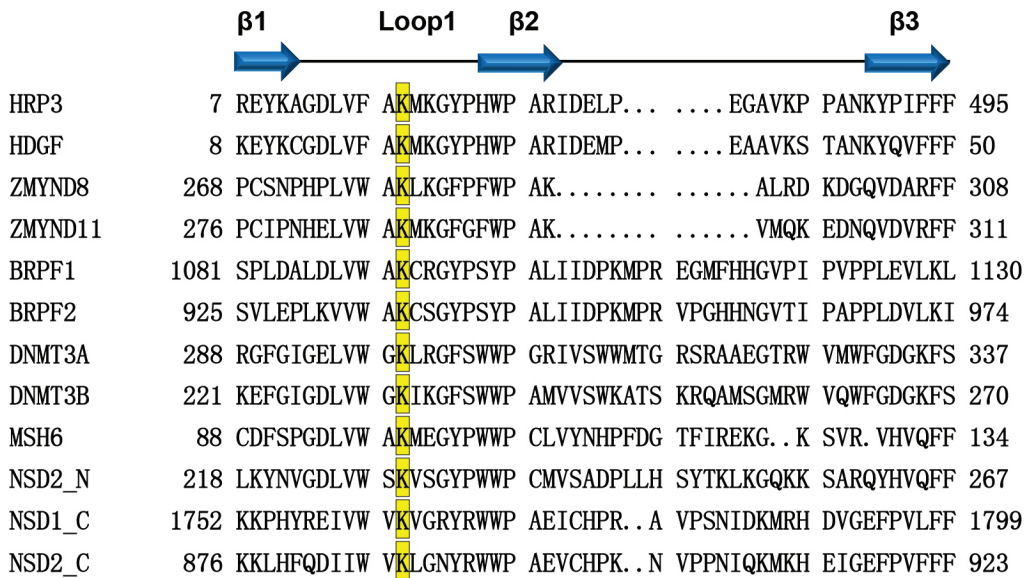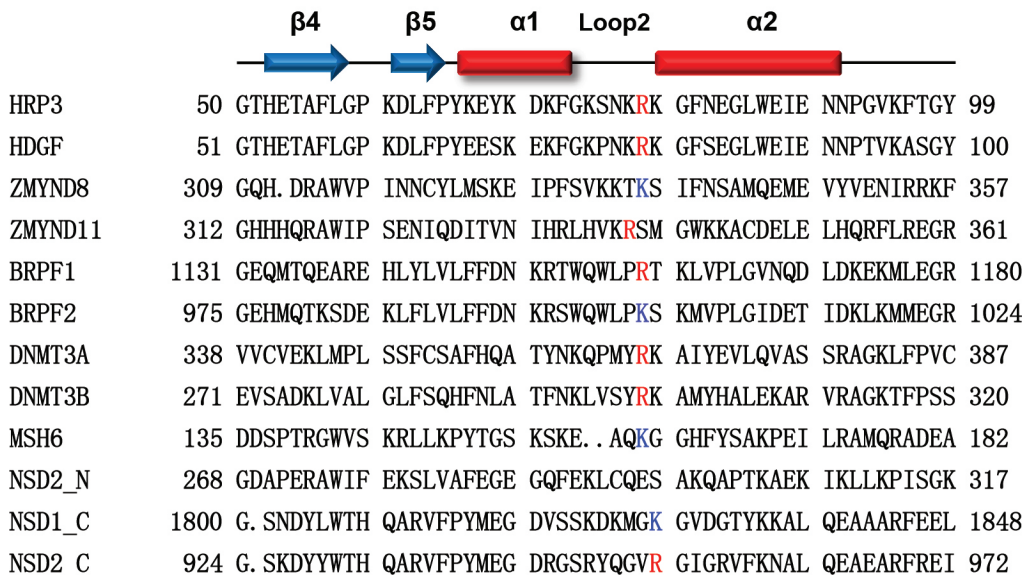

**Supplementary Figure S5.** Sequence alignments of several PWWP domains. One or two human PWWP domains from each subfamily of PWWP-containing proteins are listed. Secondary structural elements from HRP3 PWWP are shown above the sequences. The conserved K18 in loop 1 of HRP3 PWWP and its counterparts in other PWWP domains are highlighted. R78 in loop 2 of HRP3 PWWP and its corresponding or neighboring basic residues in the other PWWP domains are color coded.

## Supplementary Table S1. Data collection and refinement statistics

| Crystal                                  | Free PWWP(8-94)                    | PWWP(1-99) with 16-mer-TA | PWWP(1-99) with 10-mer-GC | PWWP(1-99) with DNA and H3(33-40)K36me3 | PWWP(1-99) with DNA and H3(33-40)K36me2 |
|------------------------------------------|------------------------------------|---------------------------|---------------------------|-----------------------------------------|-----------------------------------------|
| PDB entry                                | 6IIP                               | 6IIQ                      | 6IIR                      | 6IIS                                    | 6IIT                                    |
| Beam line                                | SSRF-BL19U1                        | SSRF-BL19U1               | SSRF-BL19U1               | SSRF-BL19U1                             | SSRF-BL17U1                             |
| Wavelength                               | 0.91531                            | 0.97853                   | 0.97853                   | 0.97853                                 | 0.97945                                 |
| Space group                              | $P2_12_12_1$                       | $C2_1$                    | $P3_1$                    | $P3_1$                                  | $P3_1$                                  |
| Unit cell                                |                                    |                           |                           |                                         |                                         |
| a, b, c (Å)                              | 38.5, 39.9, 97.4                   | 57.4, 33.6, 201.2         | 33.6, 33.6, 197.9         | 33.5, 33.5, 198.8                       | 33.6, 33.6, 200.1                       |
| $\alpha, \beta, \gamma$ (°)              | 90.0, 90.0, 90.0                   | 90.0, 90.0, 90.0          | 90.0, 90.0, 120.0         | 90.0, 90.0, 120.0                       | 90.0, 90.0, 120.0                       |
| Resolution (Å)                           | 50.0-0.95 (0.97-0.95) <sup>a</sup> | 30.0-1.85 (1.89-1.85)     | 50.0-2.20 (2.24-2.20)     | 50.0-2.35 (2.39-2.35)                   | 50.0-2.10 (2.14-2.10)                   |
| R <sub>sym</sub>                         | 0.072 (0.455)                      | 0.084 (0.611)             | 0.111 (0.975)             | 0.087 (0.533)                           | 0.135 (1.17)                            |
| I/σ (I)                                  | 52.6 (5.3)                         | 22.3 (2.0)                | 35.9 (2.1)                | 16.0 (2.0)                              | 36.5 (4.1)                              |
| Completeness (%)                         | 97.4 (86.0)                        | 94.3 (96.4)               | 99.9 (100)                | 91.6 (84.2)                             | 100.0 (100.0)                           |
| Redundancy                               | 11.9 (11.2)                        | 4.2 (4.3)                 | 7.5 (7.0)                 | 3.6 (3.9)                               | 7.2 (6.9)                               |
| Number of unique reflections             | 93005                              | 31501                     | 12832                     | 9478                                    | 14978                                   |
| R <sub>work</sub> /R <sub>free</sub> (%) | 19.7/20.5                          | 20.6/25.3                 | 20.2/25.8                 | 18.6/26.3                               | 19.1/26.4                               |
| Number of non-H atoms                    |                                    |                           |                           |                                         |                                         |
| Protein                                  | 1432                               | 2432                      | 1624                      | 1632                                    | 1638                                    |
| Peptide                                  | /                                  | /                         | /                         | 72                                      | 70                                      |
| DNA                                      | /                                  | 615                       | 410                       | 410                                     | 410                                     |
| Water                                    | 294                                | 186                       | 5                         | 18                                      | 52                                      |
| Average B factors (Å <sup>2</sup> )      |                                    |                           |                           |                                         |                                         |
| Protein                                  | 10.4                               | 36.5                      | 79.3                      | 47.4                                    | 43.5                                    |
| Peptide                                  | /                                  | /                         | /                         | 66.6                                    | 73.4                                    |
| DNA                                      | /                                  | 45.5                      | 83.7                      | 50.7                                    | 53.9                                    |
| Water                                    | 19.2                               | 46.3                      | 70.6                      | 44.1                                    | 45.4                                    |
| R.m.s. deviations                        |                                    |                           |                           |                                         |                                         |
| Bond lengths (Å)                         | 0.006                              | 0.008                     | 0.009                     | 0.010                                   | 0.008                                   |
| Bond angles (°)                          | 1.16                               | 1.12                      | 1.17                      | 1.31                                    | 1.09                                    |

<sup>a</sup> Highest resolution shell (in Å) shown in parentheses.
